# Supplementary material for: Dynamic Olfactometry and Oil Refinery Odour Samples: Application of a New Method for Occupational Risk Assessment
Source: MDPI journal article supplement (doi:10.3390/toxics10050202), 2022-04-20
Supplement: s1 [file s1]

# Supplementary Materials: Dynamic Olfactometry and Oil Refinery Odour Samples: Application of a New Method for Occupational Risk Assessment

Andrea Spinazzè, Elisa Polvara, Andrea Cattaneo, Marzio Invernizzi, Domenico Maria Cavallo and Selena Sironi

**Table S1.** Parameter for CDI calculation.

| Parameter [unit]                                                       | “Commercial Lab” Scenario                                                                                                                                                                      | “Institutional Lab” scenario |
|------------------------------------------------------------------------|------------------------------------------------------------------------------------------------------------------------------------------------------------------------------------------------|------------------------------|
| Inhalation Unit Risk - IUR [ $\mu\text{g}/\text{m}^3$ ]                | Retrieved by the Risk Assessment Information System ( <a href="https://rais.ornl.gov/">https://rais.ornl.gov/</a> ) for carcinogen chemical in the odour sample<br>(Carcinogen cat. 1A, 1B, 2) |                              |
| Exposure concentration - $C_{\text{air}}$ [ $\mu\text{g}/\text{m}^3$ ] | Chemical's concentration in the odour sample<br>(Carcinogen cat. 1A, 1B, 2)                                                                                                                    |                              |
| Exposure Frequency - $\text{EF}_{\text{iw}}$ [day/year]                | 90                                                                                                                                                                                             | 10                           |
| Exposure Duration - $\text{ED}_{\text{iw}}$ [year]                     | 10                                                                                                                                                                                             | 7                            |
| Exposure Time - $\text{ET}_{\text{iw}}$ [hours/day]                    | 0,073                                                                                                                                                                                          | 0,17                         |
| Averaging time - $\text{AT}_{\text{iw}}$ [days/years]                  | 365                                                                                                                                                                                            | 365                          |
| Lifetime of the exposed individuals - LT [years]                       | 70                                                                                                                                                                                             | 70                           |

Parameter for CDI calculation was derived from [19] and applied as described in [30].

**Table S2.** Concentration of pollutants (minimum – maximum) observed in the samples collected. The quantification of the single compounds was performed assuming a unit response factor for the different chemicals observed based on toluene calibration curve.

| Compound                       | $C_{\text{MIN tol. eq.}}$<br>[ $\text{mg}/\text{m}^3$ ] | $C_{\text{MAX tol. eq.}}$<br>[ $\text{mg}/\text{m}^3$ ] |
|--------------------------------|---------------------------------------------------------|---------------------------------------------------------|
| 1,3-Dioxolane, 2-methyl-       | 0.02                                                    | 0.17                                                    |
| 1-Heptene, 5-methyl-           | 0.01                                                    | 0.01                                                    |
| 1-Hexanol, 2-ethyl-            | 0.01                                                    | 0.01                                                    |
| 1-Pentene, 2-methyl-           | 0.003                                                   | 0.00                                                    |
| 1-Undecanol                    | 0.03                                                    | 0.71                                                    |
| 2,4-Dimethylstyrene            | 0.02                                                    | 0.05                                                    |
| 2-Butanone                     | 0.07                                                    | 0.07                                                    |
| 2-Methyl-1-butene              | 0.08                                                    | 0.08                                                    |
| 2-Pentene                      | 0.13                                                    | 0.13                                                    |
| 2-Pentene, (Z)-                | 0.04                                                    | 0.04                                                    |
| 2-Propanol, 2-methyl-          | 0.32                                                    | 0.32                                                    |
| 2-Undecene, 6-methyl-,         | 0.02                                                    | 0.02                                                    |
| 3-Heptene, 3-ethyl-            | 0.01                                                    | 0.01                                                    |
| 3-Hexene, 3-methyl-,           | 0.06                                                    | 0.06                                                    |
| 3-Methyl-3-hexene              | 0.02                                                    | 0.02                                                    |
| 4-Decene                       | 0.06                                                    | 0.06                                                    |
| Benzene                        | 0.24                                                    | 1.83                                                    |
| Benzene, (1,1-dimethylpropyl)- | 0.04                                                    | 0.04                                                    |
| Benzene, (1-methylethyl)-      | 0.004                                                   | 0.52                                                    |
| Benzene, (1-methylpropyl)-     | 0.01                                                    | 0.24                                                    |
| Benzene, (2-methyloctyl)-      | 0.01                                                    | 0.02                                                    |
| Benzene, (3,3-dimethylbutyl)-  | 0.05                                                    | 0.05                                                    |
| Benzene, 1,2,3-trimethyl-      | 0.004                                                   | 0.55                                                    |
| Benzene, 1,2,4,5-tetramethyl-  | 0.03                                                    | 0.03                                                    |

| Compound                              | C <sub>MIN</sub> tol. eq.<br>[mg/m <sup>3</sup> ] | C <sub>MAX</sub> tol. eq.<br>[mg/m <sup>3</sup> ] |
|---------------------------------------|---------------------------------------------------|---------------------------------------------------|
| Benzene, 1,2,4-trimethyl-             | 0.01                                              | 0.01                                              |
| Benzene, 1,2-diethyl-                 | 0.03                                              | 0.03                                              |
| Benzene, 1,3-diethyl-                 | 0.004                                             | 0.07                                              |
| Benzene, 1,4-diethyl-                 | 0.01                                              | 0.03                                              |
| Benzene, 1-ethenyl-2-methyl-          | 0.01                                              | 0.01                                              |
| Benzene, 1-ethyl-2-methyl-            | 0.02                                              | 0.07                                              |
| Benzene, 1-ethyl-3-methyl-            | 0.01                                              | 0.06                                              |
| Benzene, 1-ethyl-4-methyl-            | 0.005                                             | 0.13                                              |
| Benzene, 1-methyl-3-(1-methylethyl)-  | 0.01                                              | 0.05                                              |
| Benzene, 1-methyl-3-propyl-           | 0.02                                              | 0.02                                              |
| Benzene, 1-methyl-4-(1-methylpropyl)- | 0.03                                              | 0.03                                              |
| Benzene, 1-methyl-4-propyl-           | 0.01                                              | 0.29                                              |
| Benzene, 1-propynyl-                  | 0.01                                              | 0.01                                              |
| Benzene, 4-ethyl-1,2-dimethyl-        | 0.00                                              | 0.005                                             |
| Benzene, propyl-                      | 0.01                                              | 0.01                                              |
| Butanal, 2-methyl-                    | 0.03                                              | 0.03                                              |
| Butane                                | 10.7                                              | 41.4                                              |
| Butane, 2,2,3,3-tetramethyl-          | 4.89                                              | 4.89                                              |
| Butane, 2-methyl-                     | 0.01                                              | 0.21                                              |
| cis-3-Decene                          | 0.02                                              | 0.05                                              |
| cis-4-Decene                          | 0.03                                              | 0.09                                              |
| Cycloheptane, methyl-                 | 0.005                                             | 0.005                                             |
| Cyclohexane, 1,1,3-trimethyl-         | 0.01                                              | 0.01                                              |
| Cyclohexane, 1,1-dimethyl-2-propyl-   | 0.03                                              | 0.03                                              |
| Cyclohexane, 1,2-dimethyl-            | 0.004                                             | 0.01                                              |
| Cyclohexane, 1,3-dimethyl-            | 0.01                                              | 0.43                                              |
| Cyclohexane, 1,3-dimethyl-, cis-      | 0.01                                              | 0.12                                              |
| Cyclohexane, 1,3-dimethyl-, trans-    | 0.09                                              | 0.09                                              |
| Cyclohexane, 1-ethyl-1-methyl-        | 0.16                                              | 0.16                                              |
| Cyclohexane, 1-ethyl-2,4-dimethyl-    | 0.41                                              | 0.41                                              |
| Cyclohexane, 1-methyl-3-propyl-       | 0.17                                              | 0.17                                              |
| Cyclohexane, butyl-                   | 0.14                                              | 0.14                                              |
| Cyclohexane, ethyl-                   | 0.01                                              | 0.41                                              |
| Cyclohexane, methyl-                  | 0.004                                             | 1.03                                              |
| Cyclopentane                          | 0.01                                              | 1.89                                              |
| Cyclopentane, 1,2,3-trimethyl-        | 0.003                                             | 0.003                                             |
| Cyclopentane, 1,2,3-trimethyl-,       | 0.11                                              | 0.11                                              |
| Cyclopentane, 1,2,4-trimethyl-        | 0.06                                              | 0.09                                              |
| Cyclopentane, 1-ethyl-3-methyl-       | 0.14                                              | 0.14                                              |
| Cyclopentane, ethyl-                  | 0.003                                             | 0.08                                              |
| Cyclopentane, methyl-                 | 0.003                                             | 0.14                                              |
| Cyclopentane, propyl-                 | 0.01                                              | 0.08                                              |
| Cyclopropane, 1,2-dimethyl-           | 5.04                                              | 5.04                                              |
| Decane                                | 0.07                                              | 2.47                                              |
| Decane, 2,5,9-trimethyl-              | 0.01                                              | 0.01                                              |
| Decane, 3,7-dimethyl-                 | 0.03                                              | 0.03                                              |
| Decane, 5-methyl-                     | 0.01                                              | 0.01                                              |
| Decanedioic acid, dibutyl ester       | 1.82                                              | 1.82                                              |
| Dicyclopentadiene                     | 0.02                                              | 0.53                                              |
| Disulfide, dimethyl                   | 0.004                                             | 0.01                                              |
| Dodecane                              | 0.01                                              | 0.06                                              |
| Ethylbenzene                          | 1.49                                              | 6.06                                              |
| Heptane                               | 0.004                                             | 1.42                                              |

| Compound                         | C <sub>MIN</sub> tol. eq.<br>[mg/m <sup>3</sup> ] | C <sub>MAX</sub> tol. eq.<br>[mg/m <sup>3</sup> ] |
|----------------------------------|---------------------------------------------------|---------------------------------------------------|
| Heptane, 2,3,5-trimethyl-        | 0.94                                              | 0.94                                              |
| Heptane, 2,3-dimethyl-           | 0.003                                             | 0.21                                              |
| Heptane, 2,4,6-trimethyl-        | 0.003                                             | 0.06                                              |
| Heptane, 2,4-dimethyl-           | 0.01                                              | 0.04                                              |
| Heptane, 2,5-dimethyl-           | 0.003                                             | 0.20                                              |
| Heptane, 2,6-dimethyl-           | 0.01                                              | 0.27                                              |
| Heptane, 2-methyl-               | 0.003                                             | 1.06                                              |
| Heptane, 3-ethyl-2-methyl-       | 0.03                                              | 0.03                                              |
| Heptane, 3-methyl-               | 0.01                                              | 0.79                                              |
| Heptane, 4-ethyl-                | 0.06                                              | 0.06                                              |
| Hexadecane                       | 0.01                                              | 0.01                                              |
| Hexane, 2,2,5-trimethyl-         | 0.67                                              | 0.67                                              |
| Hexane, 2,2-dimethyl-            | 0.03                                              | 0.03                                              |
| Hexane, 2,4-dimethyl-            | 0.02                                              | 2.08                                              |
| Hexane, 2,5-dimethyl-            | 0.77                                              | 0.77                                              |
| Hexane, 2-methyl-                | 0.01                                              | 0.95                                              |
| Hexane, 3,4-dimethyl-            | 0.01                                              | 0.01                                              |
| Hexane, 3-ethyl-                 | 0.11                                              | 0.11                                              |
| Hexane, 3-methyl-                | 0.01                                              | 1.07                                              |
| Indene                           | 0.01                                              | 0.01                                              |
| Mesitylene                       | 0.01                                              | 0.12                                              |
| Myrtenyl 2-methyl butyrate       | 0.03                                              | 0.03                                              |
| Naphthalene                      | 0.03                                              | 0.19                                              |
| Naphthalene, 1,2,3,4-tetrahydro- | 0.004                                             | 0.004                                             |
| n-Hexane                         | 0.003                                             | 0.37                                              |
| Nonanal                          | 0.01                                              | 0.01                                              |
| Nonane                           | 0.005                                             | 2.22                                              |
| Nonane, 2,6-dimethyl-            | 0.01                                              | 0.02                                              |
| Nonane, 3,7-dimethyl-            | 0.08                                              | 0.08                                              |
| Nonane, 3-methyl-                | 0.01                                              | 0.37                                              |
| Nonane, 4-methyl-                | 0.05                                              | 0.07                                              |
| Octane                           | 0.01                                              | 0.17                                              |
| Octane, 2,3,6-trimethyl-         | 0.02                                              | 0.35                                              |
| Octane, 2,3,7-trimethyl-         | 0.01                                              | 0.01                                              |
| Octane, 2,3-dimethyl-            | 0.02                                              | 0.02                                              |
| Octane, 2,6-dimethyl-            | 0.003                                             | 0.004                                             |
| Octane, 2-methyl-                | 0.01                                              | 0.05                                              |
| Octane, 3,6-dimethyl-            | 0.02                                              | 0.53                                              |
| Octane, 3-methyl-                | 0.50                                              | 0.50                                              |
| Octane, 4-methyl-                | 0.003                                             | 0.72                                              |
| o-Cymene                         | 0.01                                              | 0.05                                              |
| o-Xylene                         | 0.07                                              | 0.42                                              |
| p-Cymene                         | 0.01                                              | 0.05                                              |
| Pentane                          | 0.01                                              | 109.9                                             |
| Pentane, 2,2,3-trimethyl-        | 0.20                                              | 0.20                                              |
| Pentane, 2,2,4,4-tetramethyl-    | 0.06                                              | 0.06                                              |
| Pentane, 2,3,3-trimethyl-        | 0.04                                              | 3.94                                              |
| Pentane, 2,3,4-trimethyl-        | 0.02                                              | 2.27                                              |
| Pentane, 2,4-dimethyl-           | 0.08                                              | 0.08                                              |
| Pentane, 2-methyl-               | 0.002                                             | 0.14                                              |
| Pentane, 3-ethyl-2,2-dimethyl-   | 0.02                                              | 0.08                                              |
| Pentane, 3-methyl-               | 0.003                                             | 0.10                                              |
| Propane                          | 0.07                                              | 0.60                                              |

| Compound                                       | C <sub>MIN</sub> tol. eq.<br>[mg/m <sup>3</sup> ] | C <sub>MAX</sub> tol. eq.<br>[mg/m <sup>3</sup> ] |
|------------------------------------------------|---------------------------------------------------|---------------------------------------------------|
| Propane, 2-ethoxy-2-methyl-                    | 0.005                                             | 0.03                                              |
| p-Xylene                                       | 0.11                                              | 1.73                                              |
| Styrene                                        | 0.002                                             | 0.02                                              |
| Sulfurous acid, cyclohexylmethyl undecyl ester | 0.35                                              | 0.35                                              |
| Toluene                                        | 0.02                                              | 1.20                                              |
| trans-3-Decene                                 | 0.01                                              | 0.06                                              |
| trans-4-Decene                                 | 0.02                                              | 0.20                                              |
| Tridecane                                      | 0.01                                              | 0.02                                              |
| Undecane                                       | 0.01                                              | 0.70                                              |
| Undecane, 2,6-dimethyl-                        | 0.01                                              | 0.03                                              |

**Table S3.** Pollutants observed in the samples analysed, with their CAS number and the OEL (expressed in mg/m<sup>3</sup>), applied to evaluate the non-carcinogenic risk.

| Compound                             | CAS        | 1 <sup>st</sup> method<br>compound-spe-<br>cific OEL | 2 <sup>nd</sup> method<br>1 <sup>st</sup> method +<br>OELs for groups<br>of chemicals | 3 <sup>rd</sup> method<br>1 <sup>st</sup> method+ RCP<br>method | OEL category<br>only compound-specific |
|--------------------------------------|------------|------------------------------------------------------|---------------------------------------------------------------------------------------|-----------------------------------------------------------------|----------------------------------------|
| 1,3-Dioxolane, 2-methyl-             | 497-26-7   | n.d.                                                 | n.d.                                                                                  | n.d.                                                            | n.d.                                   |
| 1-Heptene, 5-methyl-                 | 13151-04-7 | n.d.                                                 | 300                                                                                   | n.d.                                                            | n.d.                                   |
| 1-Hexanol, 2-ethyl-                  | 104-76-7   | 10.8                                                 | 10.8                                                                                  | 10.8                                                            | Switzerland                            |
| 1-Pentene, 2-methyl-                 | 763-29-1   | n.d.                                                 | 300                                                                                   | n.d.                                                            | n.d.                                   |
| 1-Undecanol                          | 112-42-5   | n.d.                                                 | n.d.                                                                                  | n.d.                                                            | n.d.                                   |
| 2,4-Dimethylstyrene                  | 2234-20-0  | n.d.                                                 | 100                                                                                   | 100                                                             | n.d.                                   |
| 2-Butanone                           | 78-93-3    | 900                                                  | 900                                                                                   | 900                                                             | EU OEL                                 |
| 2-Methyl-1-butene                    | 513-35-9   | n.d.                                                 | 300                                                                                   | n.d.                                                            | n.d.                                   |
| 2-Pentene                            | 109-68-2   | n.d.                                                 | 300                                                                                   | n.d.                                                            | n.d.                                   |
| 2-Pentene, (Z)-                      | 627-20-3   | n.d.                                                 | 300                                                                                   | n.d.                                                            | n.d.                                   |
| 2-Propanol, 2-methyl-                | 75-65-0    | 214                                                  | 214                                                                                   | 214                                                             | DNEL W - ST systemic                   |
| 2-Undecene, 6-methyl-, (Z)-          | 74630-43-6 | n.d.                                                 | 600                                                                                   | n.d.                                                            | n.d.                                   |
| 3-Heptene, 3-ethyl-                  | 74764-46-8 | n.d.                                                 | 600                                                                                   | n.d.                                                            | n.d.                                   |
| 3-Hexene, 3-methyl-, (E)-            | 3899-36-3  | n.d.                                                 | 300                                                                                   | n.d.                                                            | n.d.                                   |
| 3-Methyl-3-hexene                    | 3404-65-7  | n.d.                                                 | 300                                                                                   | n.d.                                                            | n.d.                                   |
| 4-Decene                             | 19398-88-0 | n.d.                                                 | 600                                                                                   | n.d.                                                            | n.d.                                   |
| Benzene                              | 71-43-2    | 3.25                                                 | 3.25                                                                                  | 3.25                                                            | EU OEL                                 |
| Benzene, (1,1-dimethylpropyl)-       | 2049-95-8  | n.d.                                                 | 100                                                                                   | 100                                                             | n.d.                                   |
| Benzene, (1-methylethyl)-            | 98-82-8    | 250                                                  | 250                                                                                   | 250                                                             | EU OEL                                 |
| Benzene, (1-methylpropyl)-           | 135-98-8   | n.d.                                                 | 100                                                                                   | 100                                                             | n.d.                                   |
| Benzene, (2-methyloctyl)-            | 49826-80-4 | n.d.                                                 | n.d.                                                                                  | 100                                                             | n.d.                                   |
| Benzene, (3,3-dimethylbutyl)-        | 17314-92-0 | n.d.                                                 | 100                                                                                   | 100                                                             | n.d.                                   |
| Benzene, 1,2,3-trimethyl-            | 526-73-8   | 170                                                  | 170                                                                                   | 170                                                             | Poland                                 |
| Benzene, 1,2,4,5-tetramethyl-        | 95-93-2    | n.d.                                                 | 100                                                                                   | 100                                                             | n.d.                                   |
| Benzene, 1,2,4-trimethyl-            | 95-63-6    | 100                                                  | 100                                                                                   | 100                                                             | DNEL W - ST systemic                   |
| Benzene, 1,2-diethyl-                | 135-01-3   | 44.8                                                 | 44.8                                                                                  | 44.8                                                            | Germany (AGS)                          |
| Benzene, 1,3-diethyl-                | 141-93-5   | 22                                                   | 22                                                                                    | 22                                                              | Germany (AGS)                          |
| Benzene, 1,4-diethyl-                | 105-05-5   | 8.82                                                 | 8.82                                                                                  | 8.82                                                            | DNEL W - ST systemic                   |
| Benzene, 1-ethenyl-2-methyl-         | 611-15-4   | 196                                                  | 196                                                                                   | 196                                                             | Germany (DFG)                          |
| Benzene, 1-ethyl-2-methyl-           | 611-14-3   | n.d.                                                 | 100                                                                                   | 100                                                             | n.d.                                   |
| Benzene, 1-ethyl-3-methyl-           | 620-14-4   | n.d.                                                 | 100                                                                                   | 100                                                             | n.d.                                   |
| Benzene, 1-ethyl-4-methyl-           | 622-96-8   | 400                                                  | 400                                                                                   | 400                                                             | Romania                                |
| Benzene, 1-methyl-3-(1-methylethyl)- | 535-77-3   | 270                                                  | 270                                                                                   | 270                                                             | Denmark                                |
| Benzene, 1-methyl-3-propyl-          | 1074-43-7  | n.d.                                                 | 100                                                                                   | 100                                                             | n.d.                                   |

|                                       |            |      |      |      |                          |
|---------------------------------------|------------|------|------|------|--------------------------|
| Benzene, 1-methyl-4-(1-methylpropyl)- | 1595-16-0  | n.d. | 100  | 100  | n.d.                     |
| Benzene, 1-methyl-4-propyl-           | 1074-55-1  | n.d. | 100  | 100  | n.d.                     |
| Benzene, 1-propynyl-                  | 673-32-5   | n.d. | 100  | 100  | n.d.                     |
| Benzene, 4-ethyl-1,2-dimethyl-        | 934-80-5   | n.d. | 100  | 100  | n.d.                     |
| Benzene, propyl-                      | 103-65-1   | n.d. | 100  | 100  | n.d.                     |
| Butanal, 2-methyl-                    | 96-17-3    | n.d. | n.d. | n.d. | n.d.                     |
| Butane                                | 106-97-8   | 1810 | 1810 | 1810 | UK                       |
| Butane, 2,2,3,3-tetramethyl-          | 594-82-1   | 1800 | 1800 | 1800 | Finland                  |
| Butane, 2-methyl-                     | 78-78-4    | 1000 | 1000 | 1000 | People Republic of China |
| cis-3-Decene                          | 19398-86-8 | n.d. | 600  | n.d. | n.d.                     |
| Cycloheptane, methyl-                 | 4126-78-7  | n.d. | 300  | 800  | n.d.                     |
| Cyclohexane, 1,1,3-trimethyl-         | 3073-66-3  | n.d. | 600  | 800  | n.d.                     |
| Cyclohexane, 1,1-dimethyl-2-propyl-   | 81983-71-3 | n.d. | 600  | 800  | n.d.                     |
| Cyclohexane, 1,2-dimethyl-            | 583-57-3   | n.d. | 300  | 800  | n.d.                     |
| Cyclohexane, 1,3-dimethyl-            | 591-21-9   | n.d. | 300  | 800  | n.d.                     |
| Cyclohexane, 1,3-dimethyl-, cis-      | 638-04-0   | n.d. | 300  | 800  | n.d.                     |
| Cyclohexane, 1,3-dimethyl-, trans-    | 2207-03-6  | n.d. | 300  | 800  | n.d.                     |
| Cyclohexane, 1-ethyl-1-methyl-        | 4926-90-3  | n.d. | 600  | 800  | n.d.                     |
| Cyclohexane, 1-ethyl-2,4-dimethyl-    | 61142-69-6 | n.d. | 600  | 800  | n.d.                     |
| Cyclohexane, 1-methyl-3-propyl-       | 4291-80-9  | n.d. | 600  | 800  | n.d.                     |
| Cyclohexane, butyl-                   | 1678-93-9  | n.d. | 600  | 800  | n.d.                     |
| Cyclohexane, ethyl-                   | 1678-91-7  | 456  | 456  | 456  | DNEL W - ST systemic     |
| Cyclohexane, methyl-                  | 108-87-2   | 1500 | 1500 | 1500 | Romania                  |
| Cyclopentane                          | 287-92-3   | 1700 | 1700 | 1700 | Denmark                  |
| Cyclopentane, 1,2,3-trimethyl-        | 2815-57-8  | n.d. | 300  | 800  | n.d.                     |
| Cyclopentane, 1,2,3-trimethyl-        | 2613-69-6  | n.d. | 300  | 800  | n.d.                     |
| Cyclopentane, 1,2,4-trimethyl-        | 2815-58-9  | n.d. | 300  | 800  | n.d.                     |
| Cyclopentane, 1-ethyl-3-methyl-       | 3726-47-4  | n.d. | 300  | 800  | n.d.                     |
| Cyclopentane, ethyl-                  | 1640-89-7  | n.d. | 300  | 800  | n.d.                     |
| Cyclopentane, methyl-                 | 96-37-7    | 3600 | 3600 | 3600 | Germany (DFG)            |
| Cyclopentane, propyl-                 | 2040-96-2  | n.d. | 300  | 800  | n.d.                     |
| Cyclopropane, 1,2-dimethyl-, trans-   | 2402-06-4  | n.d. | 300  | 1500 | n.d.                     |
| Decane                                | 124-18-5   | 500  | 500  | 500  | denmark                  |
| Decane, 2,5,9-trimethyl-              | 62108-22-9 | n.d. | 600  | 1200 | n.d.                     |
| Decane, 3,7-dimethyl-                 | 17312-54-8 | n.d. | 600  | 1200 | n.d.                     |
| Decane, 5-methyl-                     | 13151-35-4 | n.d. | 600  | 1200 | n.d.                     |
| Decanedioic acid, dibutyl ester       | 109-43-3   | n.d. | n.d. | n.d. | n.d.                     |
| Dicyclopentadiene                     | 77-73-6    | 2.7  | 2.7  | 2.7  | Germany (DFG)            |
| Disulfide, dimethyl                   | 624-92-0   | 15.5 | 15.5 | 15.5 | DNEL W - ST systemic     |
| Dodecane                              | 112-40-3   | n.d. | 600  | 1200 | n.d.                     |
| Ethylbenzene                          | 100-41-4   | 884  | 884  | 884  | EU OEL                   |
| Heptane                               | 142-82-5   | 1200 | 1200 | 1200 | Sweden                   |
| Heptane, 2,3,5-trimethyl-             | 20278-85-7 | n.d. | 600  | 1200 | n.d.                     |
| Heptane, 2,3-dimethyl-                | 3074-71-3  | n.d. | 600  | 1200 | n.d.                     |
| Heptane, 2,4,6-trimethyl-             | 2613-61-8  | n.d. | 600  | 1200 | n.d.                     |
| Heptane, 2,4-dimethyl-                | 2213-23-2  | n.d. | 600  | 1200 | n.d.                     |
| Heptane, 2,5-dimethyl-                | 2216-30-0  | n.d. | 600  | 1200 | n.d.                     |
| Heptane, 2,6-dimethyl-                | 1072-05-5  | n.d. | 600  | 1200 | n.d.                     |
| Heptane, 2-methyl-                    | 592-27-8   | n.d. | 300  | 1200 | n.d.                     |
| Heptane, 3-ethyl-2-methyl-            | 14676-29-0 | n.d. | 600  | 1200 | n.d.                     |
| Heptane, 3-methyl-                    | 589-81-1   | 1800 | 1800 | 1800 | Finland                  |
| Heptane, 4-ethyl-                     | 2216-32-2  | n.d. | 600  | 1200 | n.d.                     |
| Hexadecane                            | 544-76-3   | n.d. | n.d. | n.d. | n.d.                     |
| Hexane, 2,2,5-trimethyl-              | 3522-94-9  | n.d. | 600  | 1200 | n.d.                     |

|                                                |             |       |       |       |                      |
|------------------------------------------------|-------------|-------|-------|-------|----------------------|
| Hexane, 2,2-dimethyl-                          | 590-73-8    | 18200 | 18200 | 18200 | Finland              |
| Hexane, 2,4-dimethyl-                          | 589-43-5    | 1800  | 1800  | 1800  | Finland              |
| Hexane, 2,5-dimethyl-                          | 592-13-2    | 1750  | 1750  | 1750  | Singapore            |
| Hexane, 2-methyl-                              | 591-76-4    | 2049  | 2049  | 2049  | TLV-STEL ACGIH       |
| Hexane, 3,4-dimethyl-                          | 583-48-2    | 1800  | 1800  | 1800  | Finland              |
| Hexane, 3-ethyl-                               | 619-99-8    | 1800  | 1800  | 1800  | Finland              |
| Hexane, 3-methyl-                              | 589-34-4    | 2049  | 2049  | 2049  | TLV-STEL ACGIH       |
| Indene                                         | 95-13-6     | 72    | 72    | 72    | UK                   |
| Mesitylene                                     | 108-67-8    | 100   | 100   | 100   | DNEL W - ST systemic |
| Myrtenyl 2-methyl butyrate                     | 138530-44-6 | n.d.  | n.d.  | n.d.  | n.d.                 |
| Naphthalene                                    | 91-20-3     | 8     | 8     | 8     | Germany (AGS)        |
| Naphthalene, 1,2,3,4-tetrahydro-               | 119-64-2    | 11    | 11    | 11    | Germany (DFG)        |
| n-Hexane                                       | 110-54-3    | 144   | 144   | 144   | The Netherlands      |
| Nonanal                                        | 124-19-6    | n.d.  | n.d.  | n.d.  | n.d.                 |
| Nonane                                         | 111-84-2    | 1100  | 1100  | 1100  | Sweden               |
| Nonane, 2,6-dimethyl-                          | 17302-28-2  | n.d.  | 600   | 1200  | n.d.                 |
| Nonane, 3,7-dimethyl-                          | 17302-32-8  | n.d.  | 600   | 1200  | n.d.                 |
| Nonane, 3-methyl-                              | 59 11-04-6  | n.d.  | 600   | 1200  | n.d.                 |
| Nonane, 4-methyl-                              | 17301-94-9  | n.d.  | 600   | 1200  | n.d.                 |
| Octane                                         | 111-65-9    | 1400  | 1400  | 1400  | Sweden               |
| Octane, 2,3,6-trimethyl-                       | 62016-33-5  | n.d.  | 600   | 1200  | n.d.                 |
| Octane, 2,3,7-trimethyl-                       | 62016-34-6  | n.d.  | 600   | 1200  | n.d.                 |
| Octane, 2,3-dimethyl-                          | 7146-60-3   | n.d.  | 600   | 1200  | n.d.                 |
| Octane, 2,6-dimethyl-                          | 2051-30-1   | n.d.  | 600   | 1200  | n.d.                 |
| Octane, 2-methyl-                              | 3221-61-2   | n.d.  | 600   | 1200  | n.d.                 |
| Octane, 3,6-dimethyl-                          | 15869-94-0  | n.d.  | 600   | 1200  | n.d.                 |
| Octane, 3-methyl-                              | 2216-33-3   | n.d.  | 600   | 1200  | n.d.                 |
| Octane, 4-methyl-                              | 2216-34-4   | n.d.  | 600   | 1200  | n.d.                 |
| o-Cymene                                       | 527-84-4    | 270   | 270   | 270   | Denmark              |
| o-Xylene                                       | 95-47-6     | 442   | 442   | 442   | EU OEL               |
| p-Cymene                                       | 99-87-6     | n.d.  | 100   | 100   | n.d.                 |
| Pentane                                        | 109-66-0    | 1800  | 1800  | 1800  | USA - NIOSH          |
| Pentane, 2,2,3-trimethyl-                      | 564-02-3    | n.d.  | 600   | 1200  | n.d.                 |
| Pentane, 2,2,4,4-tetramethyl-                  | 1070-87-7   | n.d.  | 600   | 1200  | n.d.                 |
| Pentane, 2,3,3-trimethyl-                      | 560-21-4    | 940   | 940   | 940   | Germany (DFG)        |
| Pentane, 2,3,4-trimethyl-                      | 565-75-3    | 940   | 940   | 940   | Germany (DFG)        |
| Pentane, 2,4-dimethyl-                         | 108-08-7    | 2049  | 2049  | 2049  | TLV-STEL ACGIH       |
| Pentane, 2-methyl-                             | 107-83-5    | 1100  | 1100  | 1100  | Sweden               |
| Pentane, 3-ethyl-2,2-dimethyl-                 | 16747-32-3  | n.d.  | 600   | 1200  | n.d.                 |
| Pentane, 3-methyl-                             | 96-14-0     | 1100  | 1100  | 1100  | Sweden               |
| Propane                                        | 74-98-6     | 2000  | 2000  | 2000  | Finland              |
| Propane, 2-ethoxy-2-methyl-                    | 637-92-3    | 2800  | 2800  | 2800  | DNEL W - ST systemic |
| p-Xylene                                       | 106-42-3    | 442   | 442   | 442   | EU OEL               |
| Styrene                                        | 100-42-5    | 100   | 100   | 100   | DNEL W - ST systemic |
| Sulfurous acid, cyclohexylmethyl undecyl ester | 959283-66-0 | n.d.  | n.d.  | n.d.  | n.d.                 |
| Toluene                                        | 108-88-3    | 384   | 384   | 384   | EU OEL               |
| trans-3-Decene                                 | 19150-21-1  | n.d.  | 600   | n.d.  | n.d.                 |
| trans-4-Decene                                 | 19398-89-1  | n.d.  | 600   | n.d.  | n.d.                 |
| Tridecane                                      | 629-50-5    | n.d.  | 600   | 1200  | n.d.                 |
| Undecane                                       | 1120-21-4   | n.d.  | 600   | 1200  | n.d.                 |
| Undecane, 2,6-dimethyl-                        | 17301-23-4  | n.d.  | 600   | 1200  | n.d.                 |

The OELs were selected and defined from the 3 approaches suggested and described in [30]. The abbreviation “n.d.” indicates that an OEL value is not available. In 2<sup>nd</sup> and 3<sup>rd</sup> methods, the lowest OEL values for the chemical categories were selected to adopt a precautionary approach.
